# Supplementary material
Source: HighWire-hosted journal article supplement (https://www.cancerbiomed.org/content/18/4/1134)

# Supplementary materials

**Table S1** Information for 50 patients with NSCLC

| ID       | Gender | Age | Type | Stage | State   | Relapse | DFS | TMB         | RNA-seq | EGFR mutation |
|----------|--------|-----|------|-------|---------|---------|-----|-------------|---------|---------------|
| P15530A1 | M      | 54  | SCC  | IIA   | Alive   | N       | 117 | 8.133673688 | N       | N             |
| P17839A1 | M      | 59  | SCC  | IIIA  | Alive   | N       | 90  | 6.804021132 | Y       | N             |
| P18713A1 | M      | 76  | SCC  | IIB   | Alive   | N       | 109 | 4.258352839 | N       | N             |
| P19909A1 | M      | 68  | Aden | IIB   | Dead    | Y       | 105 | 1.858102371 | N       | Y             |
| P20088A1 | M      | 53  | SCC  | IIIA  | Alive   | N       | 105 | 4.745140239 | N       | N             |
| P23834A1 | F      | 48  | Aden | IIA   | Dead    | Y       | 15  | 2.025802319 | Y       | N             |
| P23912A1 | F      | 72  | Aden | IB    | Alive   | Y       | 91  | 1.959586578 | Y       | Y             |
| P24481A1 | M      | 45  | Aden | IIA   | Dead    | Y       | 14  | 11.1983717  | Y       | N             |
| P24839A1 | F      | 57  | Aden | IA    | Alive   | N       | 88  | 1.564853024 | N       | N             |
| P24907A1 | M      | 56  | Aden | IIB   | Alive   | N       | 88  | 18.94111867 | N       | N             |
| P25310A1 | M      | 50  | Aden | IIIA  | Dead    | Y       | 14  | 2.085361648 | N       | Y             |
| P25683A1 | M      | 48  | Aden | IA    | Alive   | N       | 85  | 0.742921518 | N       | N             |
| P25974A1 | M      | 67  | SCC  | IIA   | Alive   | N       | 86  | 8.620332994 | N       | N             |
| P26438A1 | M      | 56  | Aden | IIB   | Alive   | N       | 84  | 1.79639746  | N       | Y             |
| P26640A1 | M      | 55  | SCC  | IB    | Alive   | N       | 85  | 14.85073565 | N       | N             |
| P28072A1 | M      | 61  | Aden | IIA   | Alive   | N       | 79  | 1.911993568 | N       | N             |
| P28074A1 | M      | 75  | SCC  | IA    | Alive   | N       | 79  | 8.907607181 | N       | N             |
| P28132A1 | F      | 67  | Aden | IA    | Alive   | N       | 78  | 2.864549189 | N       | Y             |
| P29960A1 | M      | 54  | SCC  | IA    | Alive   | N       | 75  | 5.093054453 | Y       | Y             |
| P318002T | M      | 59  | SCC  | IIB   | Alive   | N       | 67  | 4.952073139 | Y       | N             |
| P319617T | M      | 64  | SCC  | IIB   | Alive   | N       | 66  | 4.455692149 | Y       | N             |
| P320477T | F      | 54  | Aden | IA    | Alive   | N       | 66  | 1.176218857 | N       | Y             |
| P326808T | M      | 56  | SCC  | IIIA  | Alive   | Y       | 58  | 6.168972366 | N       | N             |
| P326977T | M      | 69  | Aden | IA    | Alive   | N       | 63  | 1.589822276 | N       | Y             |
| P331307T | M      | 46  | Aden | IIIA  | Dead    | Y       | 62  | 2.842310272 | Y       | Y             |
| P332036T | M      | 68  | Aden | IIB   | Alive   | N       | 61  | 5.432208541 | N       | N             |
| P333069T | F      | 58  | Aden | IB    | Alive   | N       | 60  | 1.875568391 | Y       | Y             |
| P333253T | M      | 63  | Aden | IA    | Alive   | N       | 60  | 11.65148552 | N       | Y             |
| P336361T | F      | 59  | Aden | IA    | Missing | N       | 59  | 0.863568365 | Y       | Y             |
| P344685T | M      | 44  | Aden | IA    | Alive   | N       | 56  | 16.52550675 | N       | N             |
| P349588T | M      | 64  | Aden | IIIA  | Dead    | Y       | 54  | 4.208936458 | N       | N             |
| P355826T | M      | 58  | Aden | IIIA  | Alive   | N       | 52  | 11.88076455 | N       | N             |
| P357381T | M      | 58  | SCC  | IA    | Alive   | N       | 52  | 5.264112381 | Y       | N             |

Table S1 Continued

| ID           | Gender | Age | Type | Stage | State | Relapse | DFS | TMB         | RNA-seq | EGFR mutation |
|--------------|--------|-----|------|-------|-------|---------|-----|-------------|---------|---------------|
| P361258T     | F      | 53  | SCC  | IIIA  | Alive | N       | 50  | 1.897254152 | N       | N             |
| P363890T     | F      | 52  | Aden | IA    | Alive | Y       | 12  | 2.312744938 | Y       | Y             |
| P367497T     | F      | 50  | Aden | IIIA  | Alive | N       | 49  | 3.728924293 | N       | N             |
| P374031T     | M      | 64  | Aden | IIB   | Alive | N       | 46  | 1.411787679 | N       | N             |
| P378361T     | M      | 65  | SCC  | IIA   | Dead  | Y       | 15  | 4.691127319 | N       | N             |
| P382931T     | M      | 59  | Aden | IA    | Alive | N       | 53  | 2.270946191 | N       | Y             |
| P382977T     | M      | 56  | SCC  | IA    | Alive | N       | 43  | 13.66078992 | N       | N             |
| P388366T     | M      | 65  | Aden | IIIB  | Alive | Y       | 14  | 1.025072011 | Y       | N             |
| P392196T     | F      | 59  | SCC  | IA    | Alive | N       | 39  | 2.47026344  | N       | Y             |
| P395628T     | M      | 61  | Aden | IB    | Dead  | Y       | 1   | 6.419426543 | N       | N             |
| P397285T     | M      | 64  | Aden | IB    | Alive | Y       | 38  | 8.998396387 | N       | N             |
| P400005T     | F      | 62  | Aden | IV    | Alive | N       | 37  | 1.223366103 | Y       | N             |
| P400363T     | M      | 56  | SCC  | IB    | Alive | N       | 35  | 10.18914784 | Y       | Y             |
| P402021T     | M      | 38  | SCC  | IA    | Alive | N       | 36  | 0.571884843 | Y       | N             |
| P430491T     | M      | 72  | SCC  | IB    | Alive | N       | 28  | 5.897974118 | N       | N             |
| P431472T     | M      | 54  | Aden | IA    | Alive | Y       | 16  | 4.863215214 | Y       | Y             |
| P9121_1067_1 | M      | 57  | SCC  | IA    | Alive | Y       | 119 | 5.725887144 | N       | N             |

NSCLC, non-small cell lung cancer; Aden, adenocarcinoma; SCC, squamous cell carcinoma; LCC, large cell carcinoma; OS, overall survival; EGFR, epidermal growth factor receptor; TKIs, tyrosine kinase inhibitors; CIKs, cytokine-induced killer cells; DFS, disease-free survival; TMB, tumor mutation burden; BCMA, B-cell maturation antigen; CCL28, chemokine ligand 28; RTKs, receptor tyrosine kinases; IFN- $\gamma$ , interferon- $\gamma$ ; NKG2D, natural killer group 2 member D.

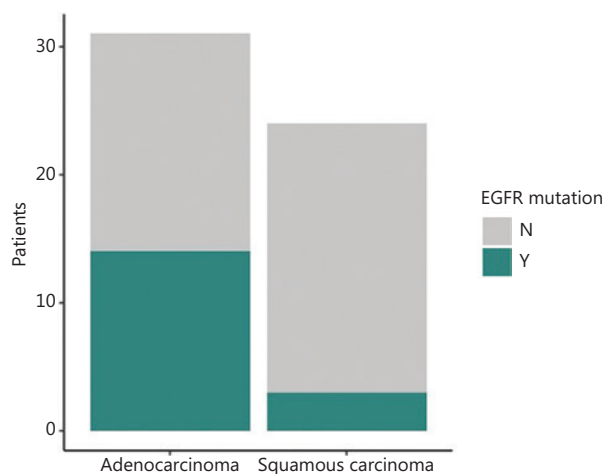

**Figure S1** Number of patients with or without EGFR mutation in the cohort.

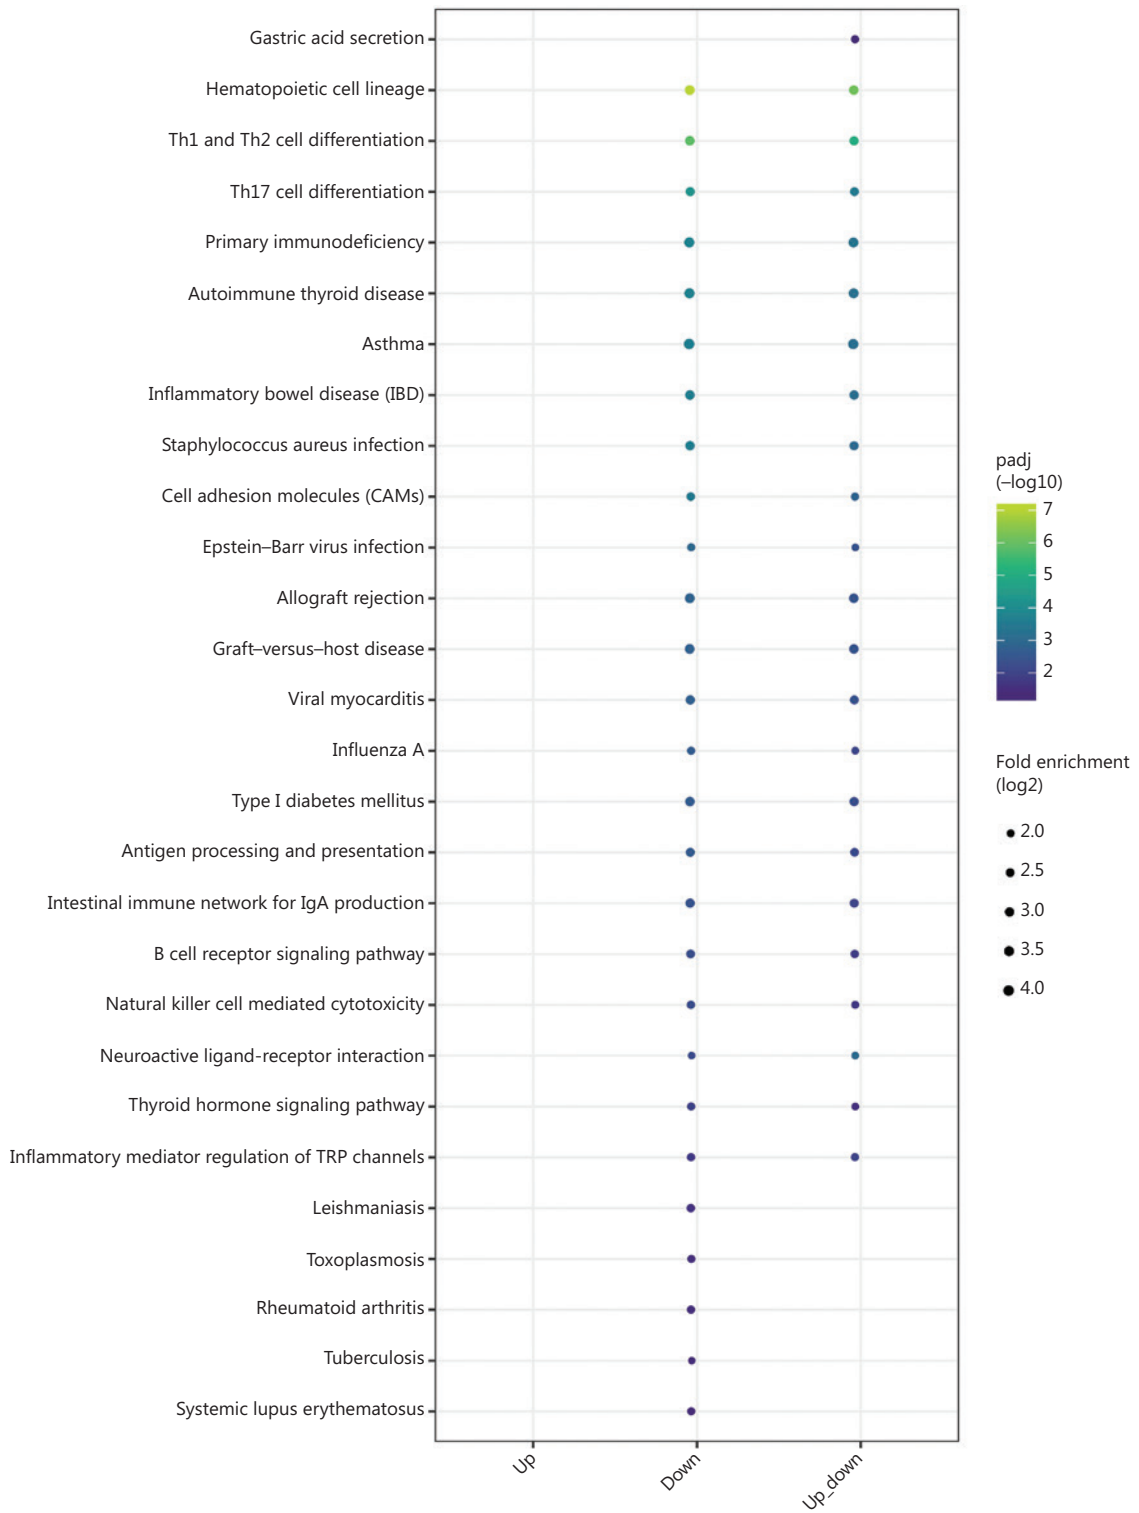

**Figure S2** KEGG pathway enrichment analysis of differentially expressed genes between high and low TMB groups in patients with SCC.

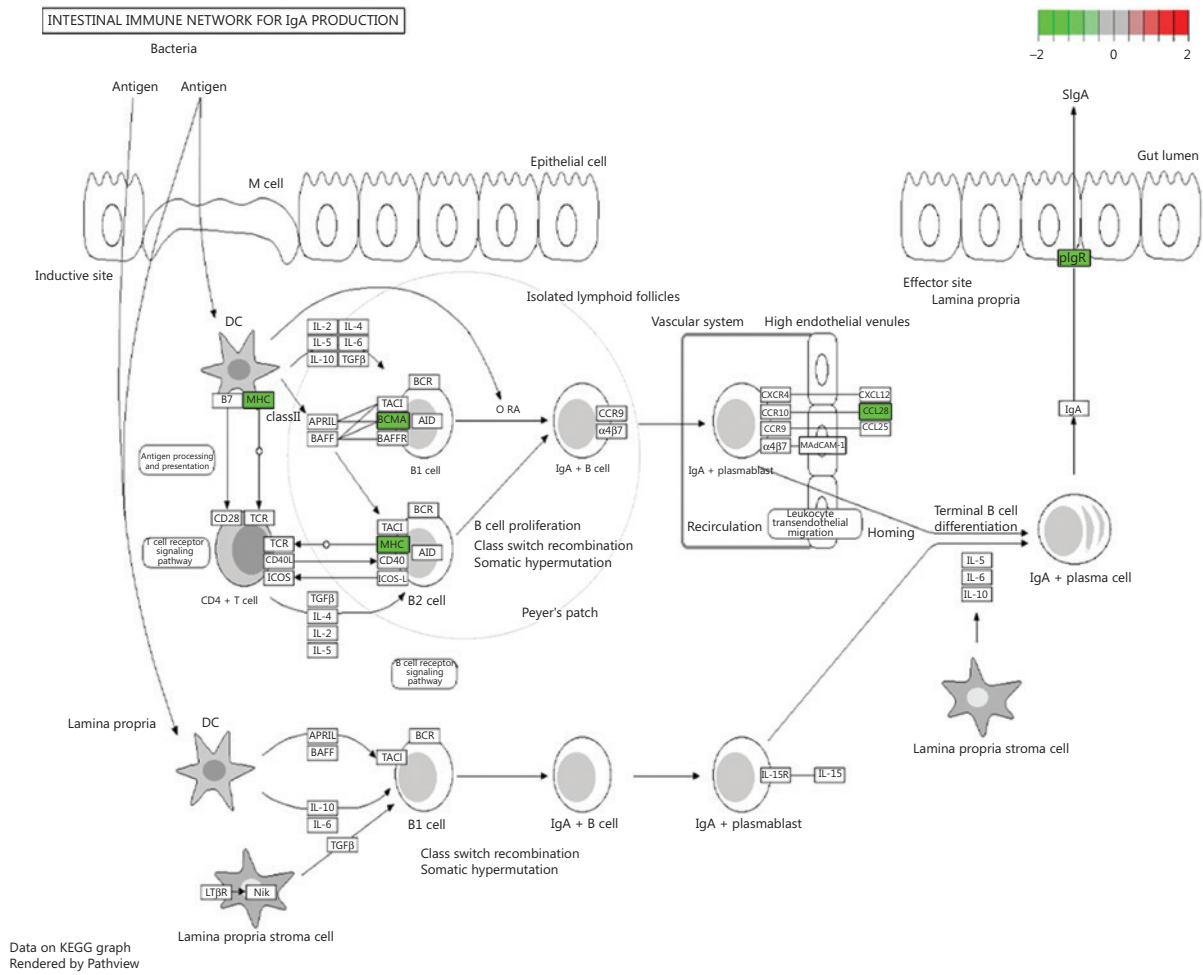

**Figure S3** Schematic of the intestinal immune network for IgA production pathway. Genes differentially expressed between lung SCC and Aden are in green.

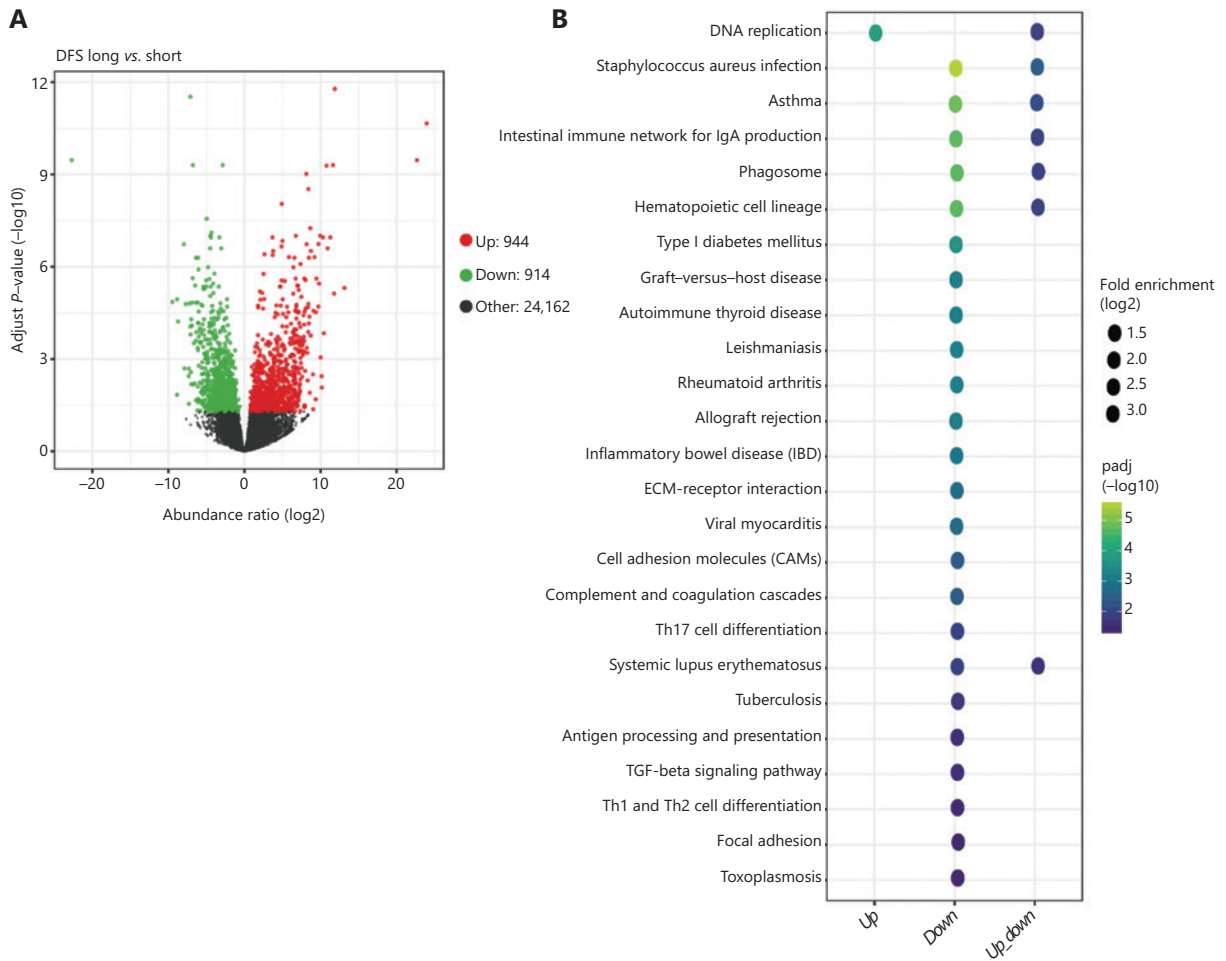

**Figure S4** KEGG pathway enrichment analysis of the differentially expressed genes in patients with long and short DFS. A. Volcano plot of differentially gene expression in tumor tissues from patients with long and short DFS after therapy. B. KEGG pathway enrichment analysis of the differentially expressed genes.

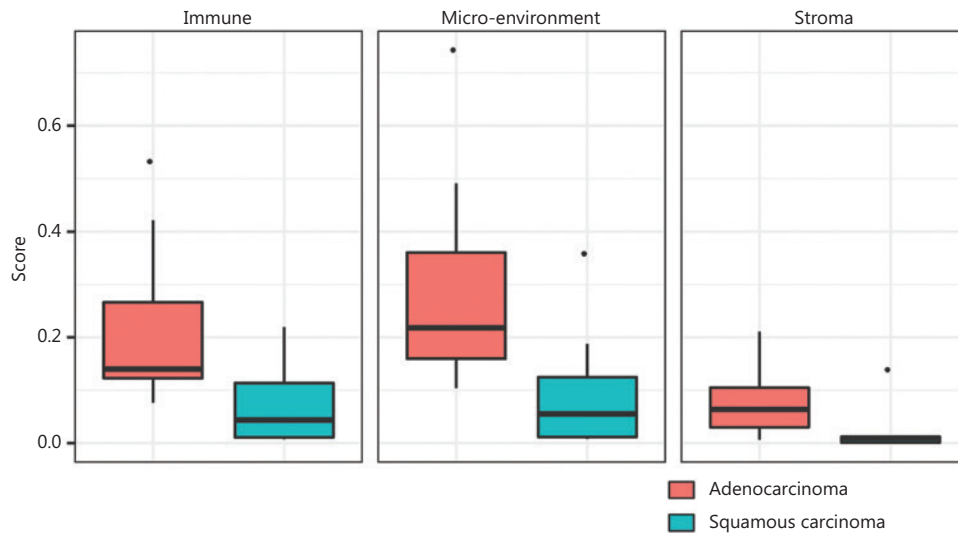

**Figure S5** Immune scores in lung SCC and Aden.

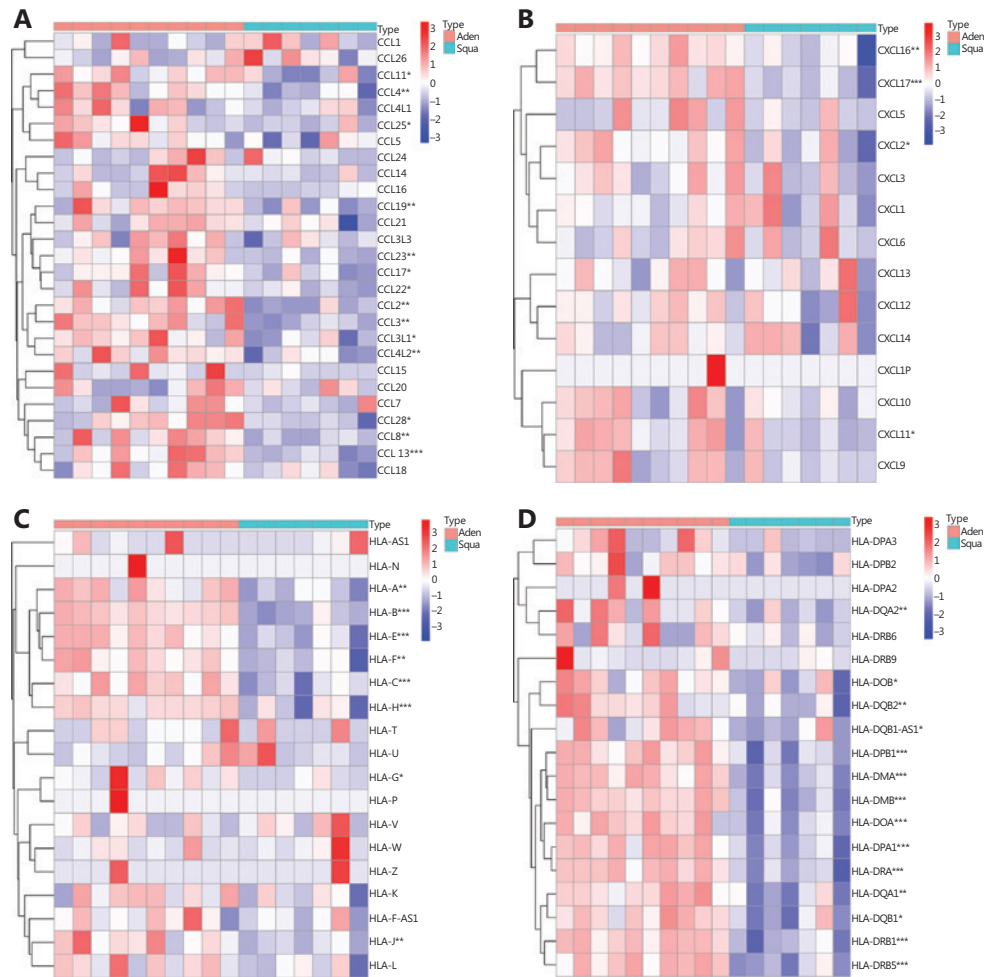

**Figure S6** Expression levels of chemokines and MHC molecules in lung SCC and Aden. A. Heatmap of expression of CCLs in SCC and Aden. B. Heatmap of expression of CXCLs in SCC and Aden. C. Heatmap of expression of MHC I in SCC and Aden. D. Heatmap of expression of MHC II in SCC and Aden. \* $P < 0.05$ , \*\* $P < 0.01$ , and \*\*\* $P < 0.001$ .

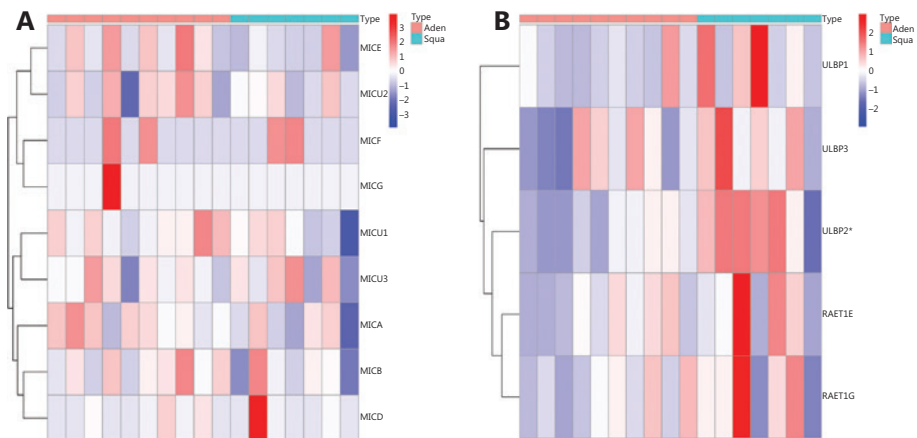

**Figure S7** Expression levels of NKG2D ligands in lung SCC and Aden. A. Heatmap of expression of MICA/B in SCC and Aden. B. Heatmap of expression of ULBP family proteins in SCC Aden. \* $P < 0.05$ .

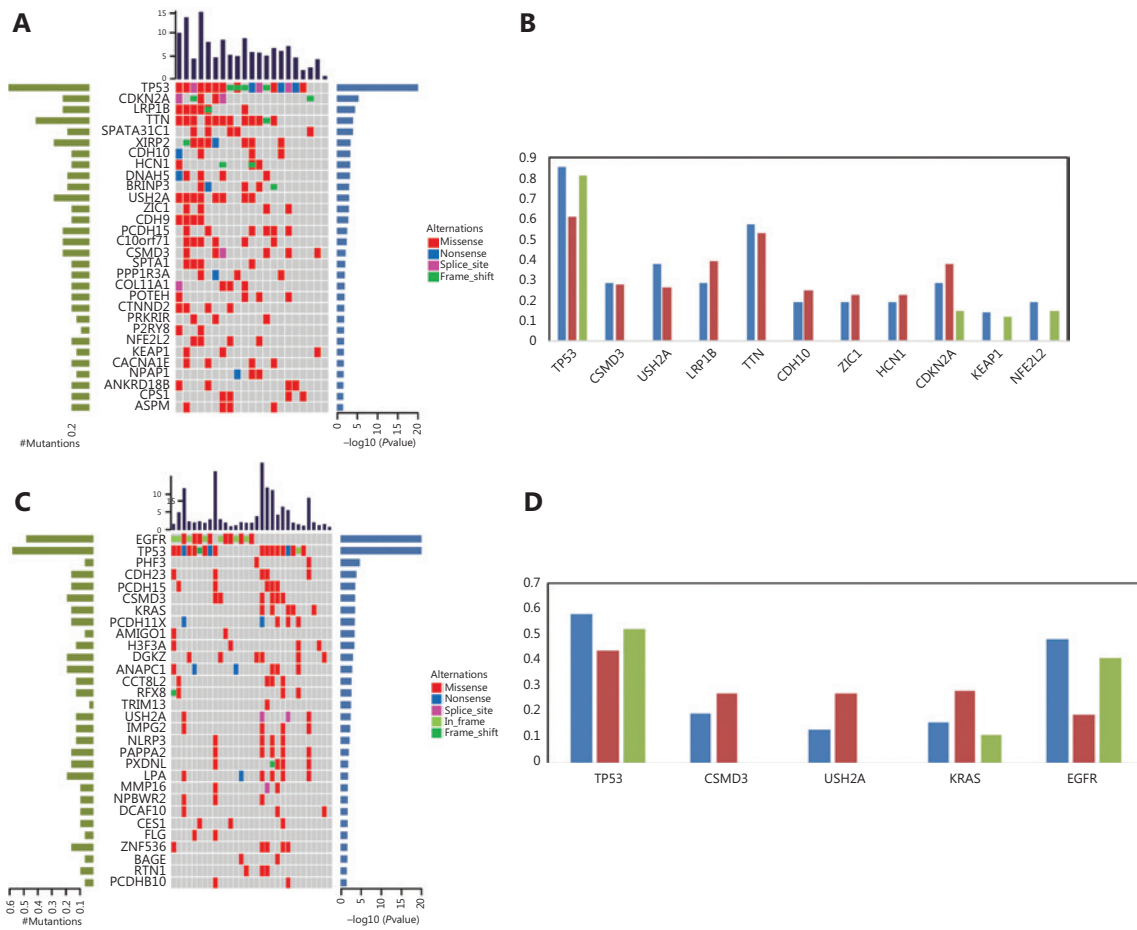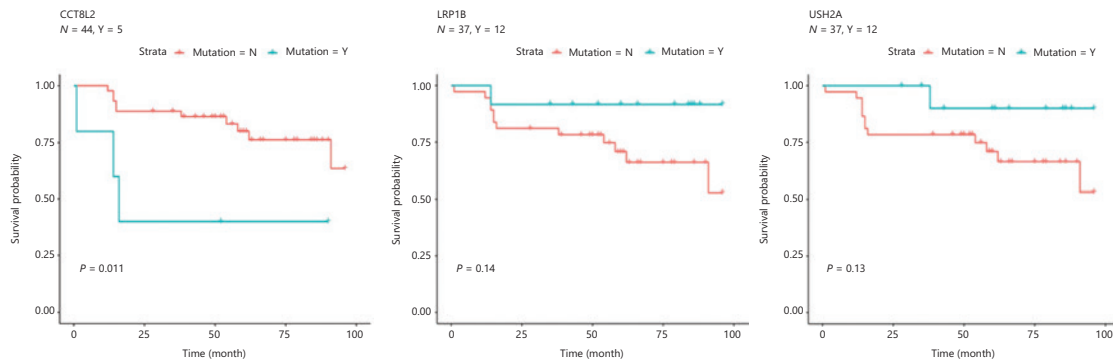

Supplement: media-1 [file media-1.pdf]
